# Supplementary material for: Chitosan Coupling Makes Microbial Biofilms Susceptible to Antibiotics
Source: PubMed Central journal article supplement — Sci Rep. 2013 Nov 28;3:3364. doi: 10.1038/srep03364 (PMC3842539; doi:10.1038/srep03364), 2013-11-28
Supplement: srep03364-s1.pdf [file srep03364-s1.pdf]

## **Chitosan Coupling Makes Microbial Biofilms Susceptible to Antibiotics**

Amin Zhang<sup>1</sup>, Haibo Mu<sup>1</sup>, Wuxia Zhang, Guoting Cui, Jie Zhu, Jinyou Duan<sup>\*</sup>

College of science, Northwest A&F University, Yangling 712100, Shaanxi, China

<sup>1</sup>These authors contributed equally to this work.

Correspondence:

Jinyou Duan, Ph.D

Tel.: +86 29-87082226;

E-mail: [jduan@nwsuaf.edu.cn](mailto:jduan@nwsuaf.edu.cn)

Keywords: Chitosan; Antibiotics; Conjugation; Bacterial biofilms

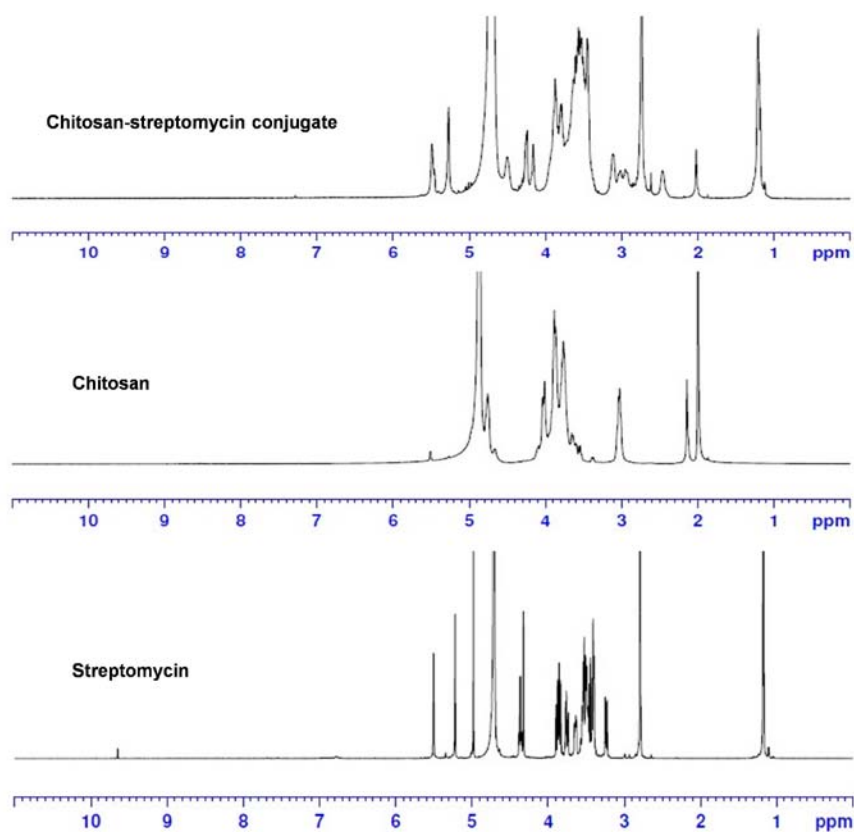

**Figure S1.** <sup>1</sup>H NMR spectra of chitosan, streptomycin and C-S conjugate. The spectra were recorded at 298 K in deuterium oxide on a Varian VNMRS-500 NMR spectrometer. HOD (4.80 ppm) was used as the chemical-shift reference in NMR experiments.

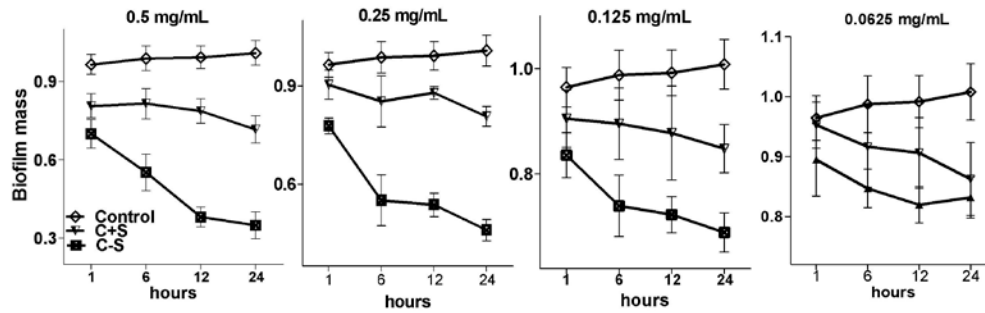

**Figure S2. Concentration dependence in the anti-biofilm capabilities of C-S conjugate.** *L. monocytogenes* biofilms were exposed to 0.25 mg/mL C-S conjugate (23% streptomycin, ~13 kDa chitosan), equivalent chitosan (C) or streptomycin (S) alone, and the respective mixture (C+S) for 24 h. Biofilms incubated in phosphate-buffered saline were used as control. Biofilm mass (A) and viable cells (B) were quantified. These experiments were performed three times with similar results each time. Error bars represent SD.

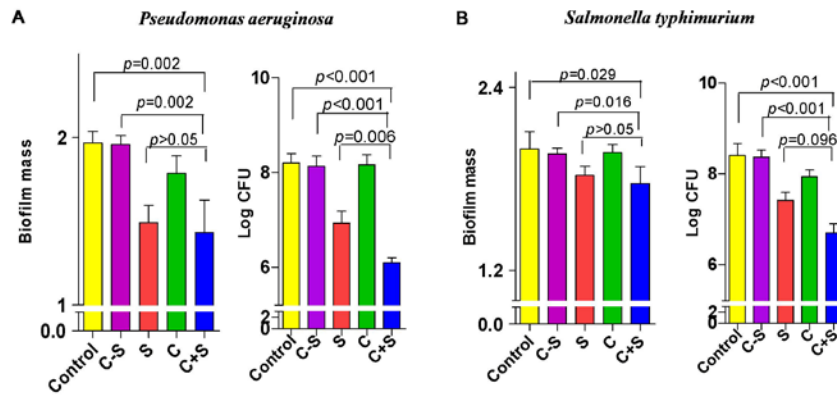

**Figure S3. C-S conjugate failed to disrupt preformed biofilms built by Gram-negative organisms.** Biofilms formed by *Pseudomonas aeruginosa* (A) or *Salmonella typhimurium* (B) were exposed to 0.25 mg/mL C-S conjugate (23% streptomycin, ~13 kDa chitosan), equivalent chitosan (C) or streptomycin (S) alone, and the respective mixture (C+S) for 24 h. Biofilms incubated in phosphate-buffered saline were used as control. Biofilm mass and viable cells were quantified. These experiments were performed three times with similar results each time. Error bars represent SD.

| Bacteria                | MIC ( $\mu\text{g/mL}$ ) |      |    |     |
|-------------------------|--------------------------|------|----|-----|
|                         | C-S                      | C    | S  | C+S |
| <i>L. monocytogenes</i> | 32                       | 256  | 8  | 32  |
| <i>L. innocua</i>       | 64                       | 1000 | 8  | 64  |
| <i>L. welshimeri</i>    | 32                       | 500  | 8  | 32  |
| <i>S. aureus</i>        | 64                       | 1000 | 8  | 64  |
| <i>E. Faecalis</i>      | 128                      | 2000 | 32 | 128 |
| <i>P. Aeruginosa</i>    | 128                      | 6000 | 32 | 128 |
| <i>S.typhimurium</i>    | 256                      | 8000 | 64 | 256 |

**Table S1. Minimum inhibitory concentrations (MICs) of compounds against planktonic bacteria.** Test compounds including C-S conjugate (23% streptomycin, ~13 kDa chitosan), chitosan (C) or streptomycin (S), and the respective mixture (C+S) were dissolved in TSB broth at an initial concentration of 1024  $\mu\text{g/mL}$  and then serially diluted. The bacteria with a final concentration of  $5 \times 10^5$  CFU/mL in TSB broth per well were inoculated at 37°C for 24 h. These experiments were performed three times with similar results each time.
